# Supplementary material for: Does T wave inversion in lead aVL predict mid-segment left anterior descending lesions in acute coronary syndrome? A retrospective study
Source: HighWire-hosted journal article supplement (doi:10.1136/bmjopen-2015-010268), 2016-01-01
Supplement: bmjopen-2015-010268supp_figures.pdf [file bmjopen-2015-010268supp_figures.pdf]

**Supplemental Figure 1a.** 12-lead electrocardiogram: T wave inversion in lead aVL

regardless of other T wave changes.

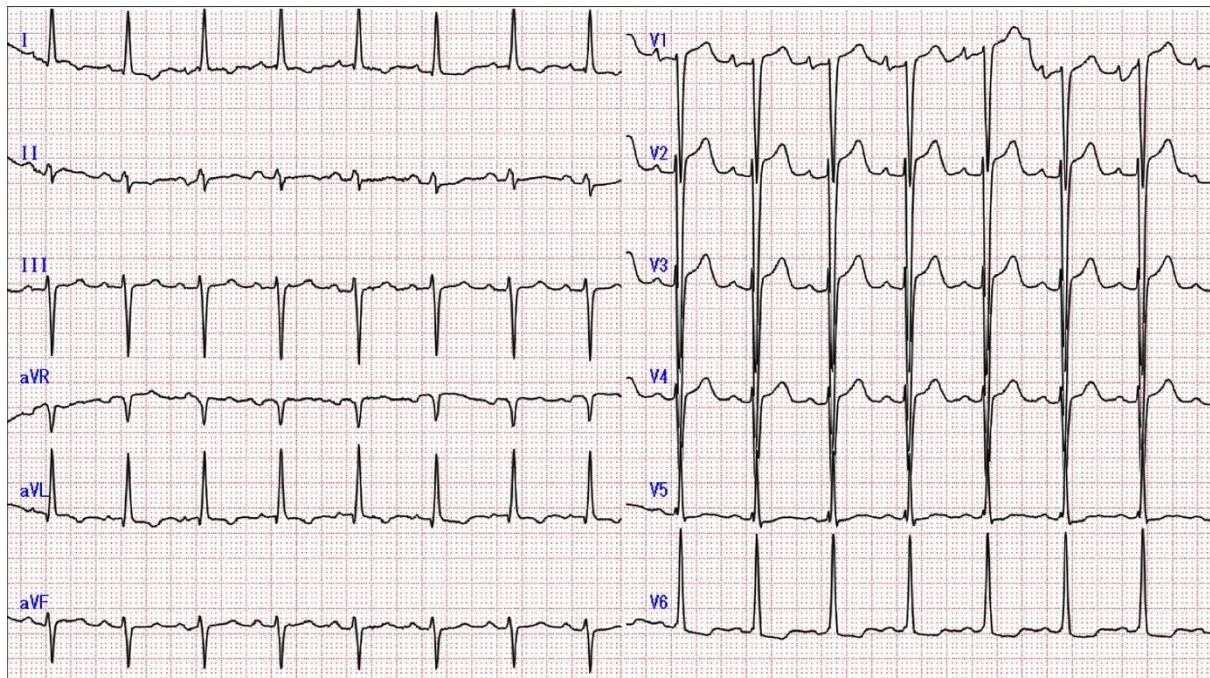

T wave inversion in lead I, aVL, V6.

**Supplemental Figure 1b.** Coronary angiography: T wave inversion in lead aVL regardless of other T wave changes.

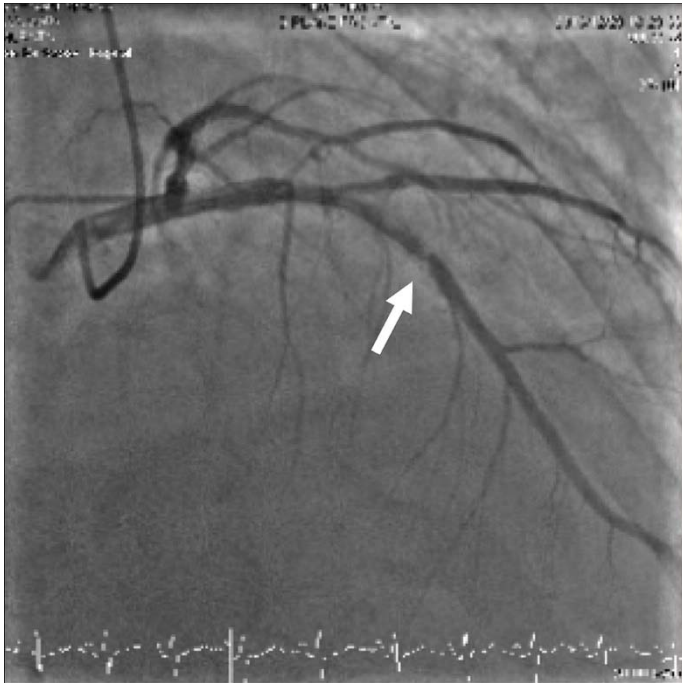

Mid-segment left anterior descending lesion (MLAD) had a 99% stenosis (arrow) with no other significant coronary artery stenosis. MLAD was the cause for ACS.

**Supplemental Figure 2a.** 12-lead electrocardiogram: Isolated T wave inversion in lead aVL.

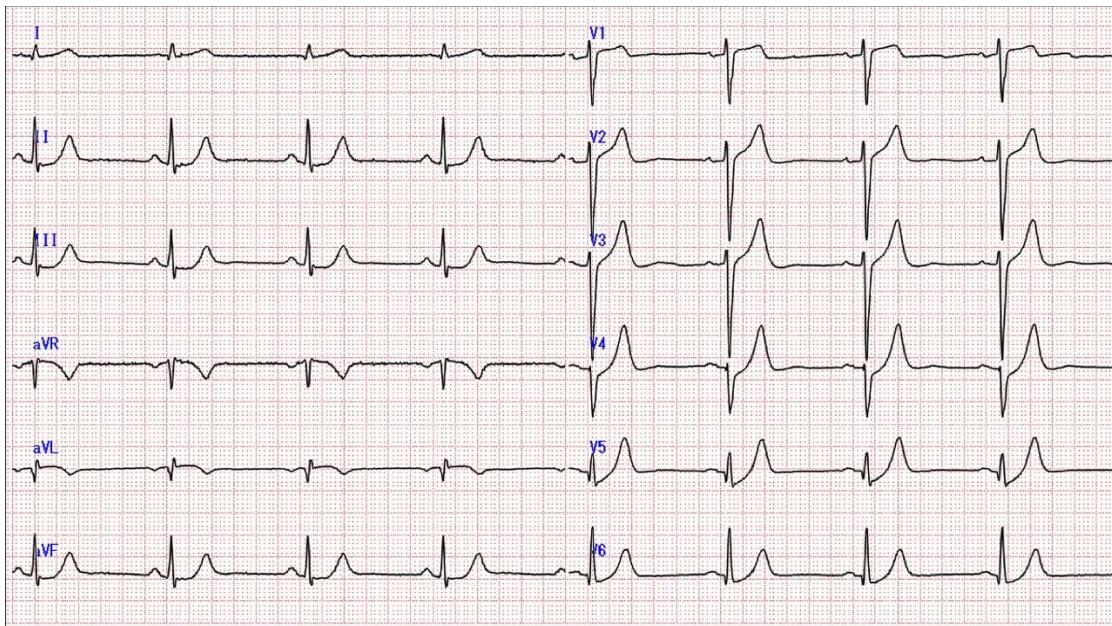

T wave inversion only in lead aVL.

**Supplemental Figure 2b.** Coronary angiography: Isolated T wave inversion in lead aVL.

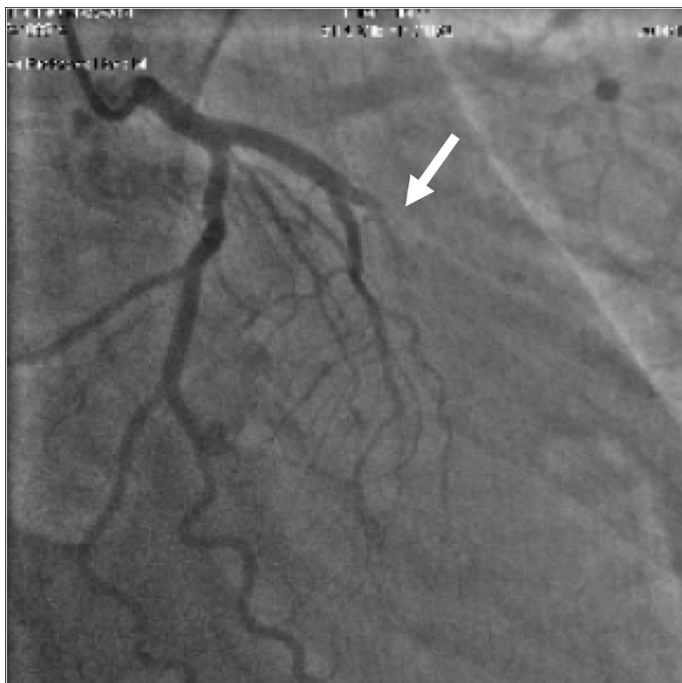

T wave inversion only in lead aVL.

Mid-segment left anterior descending (MLAD) lesion had a 100% stenosis (arrow) with no other significant coronary artery stenosis. MLAD was the cause for ACS.
